# Supplementary material for: Task Evoked EEG reveals neural processing differences in Aphantasia
Source: Research Square preprint supplement (doi:10.21203/rs.3.rs-6675918/v1), 2025-05-26
Supplement: Supplementary file 1 [file 02727a4917418c3df9976072.docx]

**Supplementary Information**

**Table S1**

*Resting State Frequency Band Power Changes (Eyes Open)*

| **Frequency Band** | | **Control** [95% CI] | **Aphantasia** [95% CI] | **t-value** | **p-value** | **d** |
| --- | --- | --- | --- | --- | --- | --- |
| Delta Power (1-3 Hz, μV2) | | | |  |  |  |
|  | Frontal | 15.64 [13.72, 17.55] | 15.52 [13.48, 17.55] | 0.0866 | .465 | - |
|  | Central | 11.32 [10.47, 12.17] | 11.65 [10.62, 12.68] | 0.491 | .312 | - |
|  | Parietal | 10.22 [9.32, 11.13] | 11.02 [9.90, 12.14] | 1.097 | .137 | - |
| Theta Power (4-7 Hz, μV2) | | | |  |  |  |
|  | Frontal | 3.02 [2.74, 3.30] | 3.09 [2.76, 3.42] | 0.316 | .376 | - |
|  | Central | 3.11 [ 2.79, 3.43] | 8.18 [2.86, 3.51] | 0.318 | .376 | - |
|  | Parietal | 2.76 [2.43, 3.10] | 2.87 [2.56, 3.19] | 0.473 | .318 | - |
| Alpha Power (8-12 Hz, μV2) | | | |  |  |  |
|  | Frontal | 1.96 [1.68, 2.24] | 1.95 [1.63, 2.27] | 0.0793 | .469 | - |
|  | Central | 2.31 [1.94, 2.67] | 2.26 [1.87, 2.64] | 0.191 | .425 | - |
|  | Parietal | 2.95 [2.34, 3.60] | 2.80 [2.22, 3.38] | 0.3424 | .366 | - |
| Beta Power (13-30 Hz, μV2) | | | |  |  |  |
|  | Frontal | 0.60 [0.48, 0.73] | 0.54 [0.47, 0.62] | 0.847 | .199 | - |
|  | Central | 0.49 [0.43, 0.55] | 0.49 [0.43, 0.55] | 0.0835 | .467 | - |
|  | Parietal | 0.49 [0.42, 0.55] | 0.49 [0.44, 0.54] | 0.148 | .441 | - |

Note. Comparisons between pre and post averaged frequency band power. All pre post values are in mean +- 95% CI. Significant differences between groups after Bonferroni correction of the significance threshold (p = .004) are indicated with bolded p-values.

**Table S2**

*Resting State Frequency Band Power Changes (Eyes Closed)*

| **Frequency Band** | | **Control** [95% CI] | **Aphantasia** [95% CI] | **t-value** | **p-value** | **d** |
| --- | --- | --- | --- | --- | --- | --- |
| Delta Power (1-3 Hz, μV2) | | | | 0.5363 | .296 |  |
|  | Frontal | 19.99 [17.86, 22.13] | 20.86 [18,46, 23.26] | 0.0866 | .465 | - |
|  | Central | 11.32 [10.47, 12.17] | 11.65 [10.62, 12.68] | 0.491 | .312 | - |
|  | Parietal | 10.22 [9.32, 11.13] | 11.02 [9.90, 12.14] | 1.097 | .137 | - |
| Theta Power (4-7 Hz, μV2) | | | |  |  |  |
|  | Frontal | 3.02 [2.74, 3.30] | 3.09 [2.76, 3.42] | 0.316 | .376 | - |
|  | Central | 3.11 [ 2.79, 3.43] | 8.18 [2.86, 3.51] | 0.318 | .376 | - |
|  | Parietal | 2.76 [2.43, 3.10] | 2.87 [2.56, 3.19] | 0.473 | .318 | - |
| Alpha Power (8-12 Hz, μV2) | | | |  |  |  |
|  | Frontal | 1.96 [1.68, 2.24] | 1.95 [1.63, 2.27] | 0.0793 | .469 | - |
|  | Central | 2.31 [1.94, 2.67] | 2.26 [1.87, 2.64] | 0.191 | .425 | - |
|  | Parietal | 2.95 [2.34, 3.60] | 2.80 [2.22, 3.38] | 0.3424 | .366 | - |
| Beta Power (13-30 Hz, μV2) | | | |  |  |  |
|  | Frontal | 0.60 [0.48, 0.73] | 0.54 [0.47, 0.62] | 0.847 | .199 | - |
|  | Central | 0.49 [0.43, 0.55] | 0.49 [0.43, 0.55] | 0.0835 | .467 | - |
|  | Parietal | 0.49 [0.42, 0.55] | 0.49 [0.44, 0.54] | 0.148 | .441 | - |

Note. Comparisons between pre and post averaged frequency band power. All pre post values are in mean +- 95% CI. Significant differences between groups after Bonferroni correction.

**Table S3.**

*VVIQ Correlations*

| **Parameters** | | | | **Spearman r** [95% CI] | | **p-value** |
| --- | --- | --- | --- | --- | --- | --- |
| **VVIQ & 2 back** | |  |  | |
|  | **Frontal** | | |  | |  |
|  | 2 Back Frontal Delta Power | | | .07 [-.18, .25] | | .454 |
|  | 2 Back Frontal Theta Power | | | .09 [-.10, .27] | | .325 |
|  | 2 Back Frontal Alpha Power | | | .03 [-.16, .21] | | .765 |
|  | 2 Back Frontal Beta Power | | | -.07 [-.25, .12] | | .462 |
|  | **Central** | | |  | |  |
|  | 2 Back Central Delta Power | | | .12 [-.07, .29] | | .204 |
|  | 2 Back Central Theta Power | | | .10 [-.08, .28] | | .265 |
|  | 2 Back Central Alpha Power | | | .03 [-.16, .21] | | .781 |
|  | 2 Back Central Beta Power | | | -.10 [-.28, .09] | | .290 |
|  | **Parietal** | | |  | |  |
|  | 2 Back Parietal Delta Power | | | .12 [-.07, .30] | | .199 |
|  | 2 Back Parietal Theta Power | | | .09 [-.10, .27] | | .325 |
|  | 2 Back Parietal Alpha Power | | | .03 [-.02, .21] | | .756 |
|  | 2 Back Parietal Beta Power | | | -0.9 [-.27, .10] | | .329 |
| **VVIQ & 3 back** | | |  |  | |
|  | | **Frontal** | | |  | |  |
|  | | 3 Back Frontal Delta Power | | | .30 [.11, .46] | | .001 |
|  | | 3 Back Frontal Theta Power | | | .19 [.00, .37] | | .043 |
|  | | 3 Back Frontal Alpha Power | | | .11 [-.08, .30] | | .247 |
|  | | 3 Back Frontal Beta Power | | | .14 [-.06, .32] | | .149 |
|  | | **Central** | | |  | |  |
|  | | 3 Back Central Delta Power | | | .23 [.04, .41] | | **.**014 |
|  | | 3 Back Central Theta Power | | | .08 [-.11, .27] | | .385 |
|  | | 3 Back Central Alpha Power | | | -.004 [-.20, .19] | | .969 |
|  | | 3 Back Central Beta Power | | | .04 [-.15, .23] | | .653 |
|  | | **Parietal** | | |  | |  |
|  | | 3 Back Parietal Delta Power | | | .20 [.009, .38] | | .035 |
|  | | 3 Back Parietal Theta Power | | | .04 [.16, .23] | | .691 |
|  | | 3 Back Parietal Alpha Power | | | .006 [-.19, .20] | | .951 |
|  | | 3 Back Parietal Beta Power | | | -.003 [-.20, .19] | | .979 |

| **VVIQ & Baseline** | |  |  | |
| --- | --- | --- | --- | --- |
|  | **Frontal** | | |  | |  |
|  | Frontal Delta EO | | | .05 [-.13, .24] | | .562 |
|  | Frontal Theta EO | | | .08 [-.11, .26] | | .406 |
|  | Frontal Alpha EO | | | -.003 [-.19, .18] | | .978 |
|  | Frontal Beta EO | | | -.002 [-.19, .18] | | .983 |
|  | Frontal Delta EC | | | .02 [-.17, .21] | | .819 |
|  | Frontal Theta EC | | | -.04 [-.23, .14] | | .638 |
|  | Frontal Alpha EC | | | -.01 [-.20, .18] | | .909 |
|  | Frontal Beta EC | | | -.05 [-.24, .13] | | .567 |
|  | **Central** | | |  | |  |
|  | Center Delta EO | | | .07 [-.11, .26] | | .429 |
|  | Center Theta EO | | | .11 [-.08, .29] | | .229 |
|  | Center Alpha EO | | | .05 [-.14, .23] | | .609 |
|  | Center Beta EO | | | -.04 [-.23, .14] | | .636 |
|  | Center Delta EC | | | .08 [-.11, .26] | | .381 |
|  | Center Theta EC | | | .04 [-.15, .22] | | .708 |
|  | Center Alpha EC | | | .02 [-.16, .21] | | .797 |
|  | Center Beta EC | | | -.009 [-.20, .18] | | .919 |
|  | **Parietal** | | |  | |  |
|  | Parietal Delta EO | | | .06 [-.16, .24] | | .506 |
|  | Parietal Theta EO | | | .06 [-.13, .24] | | .541 |
|  | Parietal Alpha EO | | | -.009 [-.19, .18] | | .925 |
|  | Parietal Beta EO | | | -.08 [-.26, .11] | | .394 |
|  | Parietal Delta EC | | | .13 [-.05 .31] | | .151 |
|  | Parietal Theta EC | | | .07 [-.11, .26] | | .429 |
|  | Parietal Alpha EC | | | .02 [-.17, .20] | | .866 |
|  | Parietal Beta EC | | | -.02 [-.21, .16] | | .809 |

**Table S4.**

*PSI-Q Correlations*

| **Parameters** | | | | **Spearman r** [95% CI] | | **p-value** |
| --- | --- | --- | --- | --- | --- | --- |
| **PSI-Q & 2 back** | |  |  | |
|  | **Frontal** | | |  | |  |
|  | 2 Back Frontal Delta Power | | | .15 [-.03, .33] | | .093 |
|  | 2 Back Frontal Theta Power | | | .14 [-.05, .31] | | .128 |
|  | 2 Back Frontal Alpha Power | | | .02 [-.16, .20] | | .833 |
|  | 2 Back Frontal Beta Power | | | -.10 [-.28, .08] | | .266 |
|  | **Central** | | |  | |  |
|  | 2 Back Central Delta Power | | | .18 [-.003, .35] | | .047 |
|  | 2 Back Central Theta Power | | | .11 [-.07, .29] | | .220 |
|  | 2 Back Central Alpha Power | | | .00 [-.18, .18] | | 1.00 |
|  | 2 Back Central Beta Power | | | -.15 [-.32, .04] | | .108 |
|  | **Parietal** | | |  | |  |
|  | 2 Back Parietal Delta Power | | | .18 [-.0061, .35] | | .051 |
|  | 2 Back Parietal Theta Power | | | .07 [-.12, .25] | | .465 |
|  | 2 Back Parietal Alpha Power | | | -.002 [-.19, .18] | | .983 |
|  | 2 Back Parietal Beta Power | | | -.16[-.33, .03] | | .087 |
| **PSI-Q & 3 back** | | |  |  | |
|  | | **Frontal** | | |  | |  |
|  | | 3 Back Frontal Delta Power | | | .36 [.18, .52] | | **<.0001** |
|  | | 3 Back Frontal Theta Power | | | .24 [.05, .41] | | .010 |
|  | | 3 Back Frontal Alpha Power | | | .12 [-.07, .31] | | .196 |
|  | | 3 Back Frontal Beta Power | | | .10 [-.09, .29] | | .292 |
|  | | **Central** | | |  | |  |
|  | | 3 Back Central Delta Power | | | .27 [.08, .44] | | .004 |
|  | | 3 Back Central Theta Power | | | .11 [-.09, .29] | | .258 |
|  | | 3 Back Central Alpha Power | | | .01 [-.18, .20] | | .893 |
|  | | 3 Back Central Beta Power | | | .006 [-.19, .20] | | .947 |
|  | | **Parietal** | | |  | |  |
|  | | 3 Back Parietal Delta Power | | | .25 [.06, .42] | | .007 |
|  | | 3 Back Parietal Theta Power | | | .06 [-.14, .24] | | .562 |
|  | | 3 Back Parietal Alpha Power | | | .02 [-.17, .21] | | .805 |
|  | | 3 Back Parietal Beta Power | | | -.04 [-.23, .15] | | .657 |

| **PSI-Q & Baseline** | |  |  | |
| --- | --- | --- | --- | --- |
|  | **Frontal** | | |  | |  |
|  | Frontal Delta EO | | | .13 [-.06, .31] | | .156 |
|  | Frontal Theta EO | | | .11 [-.07, .29] | | .220 |
|  | Frontal Alpha EO | | | .02 [-.17, .20] | | .855 |
|  | Frontal Beta EO | | | -.05 [-.23, .14] | | .596 |
|  | Frontal Delta EC | | | .11 [-.07, .29] | | .218 |
|  | Frontal Theta EC | | | -.004 [-.19, .18] | | .964 |
|  | Frontal Alpha EC | | | .06 [-.13, .24] | | .538 |
|  | Frontal Beta EC | | | -.09 [-.27, .10] | | .337 |
|  | **Central** | | |  | |  |
|  | Center Delta EO | | | .15 [-.04, .32] | | .115 |
|  | Center Theta EO | | | .13 [-.06, .31] | | .167 |
|  | Center Alpha EO | | | .04 [-.14, .23] | | .653 |
|  | Center Beta EO | | | -.11 [-.29, .08] | | .250 |
|  | Center Delta EC | | | .13 [-.05, .31] | | .148 |
|  | Center Theta EC | | | .04 [-.14, .23] | | .652 |
|  | Center Alpha EC | | | .09 [-.10, .27] | | .359 |
|  | Center Beta EC | | | -.07 [-.25, .12] | | .445 |
|  | **Parietal** | | |  | |  |
|  | Parietal Delta EO | | | .11 [-.08, .29] | | .230 |
|  | Parietal Theta EO | | | .07 [-.12, .25] | | .447 |
|  | Parietal Alpha EO | | | .02 [-.16, .21] | | .800 |
|  | Parietal Beta EO | | | -.16 [-.31, .05] | | .142 |
|  | Parietal Delta EC | | | .20 [.015, .37] | | .030 |
|  | Parietal Theta EC | | | .08 [-.10, .26] | | .365 |
|  | Parietal Alpha EC | | | .08 [-.10, .26] | | .369 |
|  | Parietal Beta EC | | | -.06 [-.24, .13] | | .532 |

**Table S5.**

SAM Episodic Subcategory Correlations

| **Parameters** | | | | **Spearman r** [95% CI] | | **p-value** |
| --- | --- | --- | --- | --- | --- | --- |
| **SAM Episodic & 2 back** | |  |  | |
|  | **Frontal** | | |  | |  |
|  | 2 Back Frontal Delta Power | | | .14 [-.04, .32] | | .122 |
|  | 2 Back Frontal Theta Power | | | .08 [-.10, .26] | | .381 |
|  | 2 Back Frontal Alpha Power | | | .02 [-.17, .20] | | .840 |
|  | 2 Back Frontal Beta Power | | | .01 [-.17, .19] | | .909 |
|  | **Central** | | |  | |  |
|  | 2 Back Central Delta Power | | | .09 [-.09, .27] | | .323 |
|  | 2 Back Central Theta Power | | | .04 [-.15, .22] | | .675 |
|  | 2 Back Central Alpha Power | | | -.02 [-.20, .17] | | .865 |
|  | 2 Back Central Beta Power | | | -.01 [-.20, .17] | | .877 |
|  | **Parietal** | | |  | |  |
|  | 2 Back Parietal Delta Power | | | -.04 [-.22, .15] | | .692 |
|  | 2 Back Parietal Theta Power | | | -.02 [-.20, .16] | | .819 |
|  | 2 Back Parietal Alpha Power | | | -.01 [-.20, .17] | | .878 |
|  | 2 Back Parietal Beta Power | | | -.03 [-.21, .16] | | .785 |
| **SAM Episodic & 3 back** | | |  |  | |
|  | | **Frontal** | | |  | |  |
|  | | 3 Back Frontal Delta Power | | | .18 [-.02, .36] | | .066 |
|  | | 3 Back Frontal Theta Power | | | .18 [-.01, .36] | | .058 |
|  | | 3 Back Frontal Alpha Power | | | .13 [-.06, .31] | | .173 |
|  | | 3 Back Frontal Beta Power | | | .12 [-.08, .30] | | .224 |
|  | | **Central** | | |  | |  |
|  | | 3 Back Central Delta Power | | | .19 [.001, .37] | | .042 |
|  | | 3 Back Central Theta Power | | | .12 [-.08, .30] | | .226 |
|  | | 3 Back Central Alpha Power | | | .007 [-.19, .20] | | .942 |
|  | | 3 Back Central Beta Power | | | .12 [-.07, .31] | | .194 |
|  | | 3 Back Parietal Delta Power | | | .14 [-.06, .32] | | .149 |
|  | | **Parietal** | | |  | |  |
|  | | 3 Back Parietal Theta Power | | | .06 [-.14, .25] | | .546 |
|  | | 3 Back Parietal Alpha Power | | | .04 [-.16, .23] | | .709 |
|  | | 3 Back Parietal Beta Power | | | .09 [-.10, .28] | | .342 |

| **SAM Episodic & Baseline** | |  |  | |
| --- | --- | --- | --- | --- |
|  | **Frontal** | | |  | |  |
|  | Frontal Delta EO | | | .02 [-.17, .20] | | .840 |
|  | Frontal Theta EO | | | -.04 [-.22, .15] | | .669 |
|  | Frontal Alpha EO | | | -.07 [-.25, .12] | | .459 |
|  | Frontal Beta EO | | | -.02 [-.20, .17] | | .828 |
|  | Frontal Delta EC | | | .17 [-.02, .34] | | .073 |
|  | Frontal Theta EC | | | .01 [-.18, .19] | | .931 |
|  | Frontal Alpha EC | | | -.02 [-.21, .16] | | .809 |
|  | **Central** | | |  | |  |
|  | Frontal Beta EC | | | -.06 [-.24, .13] | | .524 |
|  | Center Delta EO | | | .07 [-.12, .25] | | .441 |
|  | Center Theta EO | | | -.05 [-.23, .14] | | .579 |
|  | Center Alpha EO | | | -.09 [-.27, .09] | | .320 |
|  | Center Beta EO | | | -.13 [-.31, .05] | | .147 |
|  | Center Delta EC | | | .11 [-.08, .29] | | .251 |
|  | Center Theta EC | | | -.02 [-.21, .16] | | .795 |
|  | Center Alpha EC | | | -.04 [-.22, .15] | | .685 |
|  | Center Beta EC | | | -.12 [-.30, .06] | | .184 |
|  | **Parietal** | | |  | |  |
|  | Parietal Delta EO | | | .01 [-.18, .19] | | .923 |
|  | Parietal Theta EO | | | -.09 [-.27, .10] | | .326 |
|  | Parietal Alpha EO | | | -.10 [-.28, .09] | | .291 |
|  | Parietal Beta EO | | | -.10 [-.28, .08] | | .268 |
|  | Parietal Delta EC | | | .04 [-.15, .22] | | .659 |
|  | Parietal Theta EC | | | -.06 [-.24, .13] | | .529 |
|  | Parietal Alpha EC | | | -.01 [-.20, .17] | | .908 |
|  | Parietal Beta EC | | | -.09 [-.27, .09] | | .320 |

| **SAM Semantic & 2 back** |  |  |
| --- | --- | --- |
| **Frontal** |  |  |
| Delta Power & semantic | .05 [-.13, .23] | .576 |
| Theta Power & semantic | -.01 [-.2, .17] | .889 |
| Alpha Power & semantic | .09 [-.1, .27] | .343 |
| Beta Power & semantic | .02 [-.17, .2] | .874 |
| **Central** |  |  |
| Delta Power & semantic | .05 [-.13, .23] | .570 |
| Theta Power & semantic | -.05 [-.23, .13] | .578 |
| Alpha Power & semantic | .08 [-.10, .30] | .361 |
| Beta Power & semantic | .06 [-.12, .24] | .487 |
| **Parietal** |  |  |
| Delta Power & semantic | -.01 [-.20, .20] | .912 |
| Theta Power & semantic | -.10 [-.30, .08] | .268 |
| Alpha Power & semantic | .10 [-.10, .30] | .267 |
| Beta Power & semantic | .10 [-.10, .30] | .322 |

| **SAM Semantic & 3 back** | | |  | |  | |
| --- | --- | --- | --- | --- | --- | --- |
| **Frontal** | | |  | |  | |
| Delta Power & semantic | | | .17 [-.02, .35] | | .077 | |
| Theta Power & semantic | | | .18 [-.02, .40] | | .065 | |
| Alpha Power & semantic | | | .20 [.00, .40] | | .043 | |
| Beta Power & semantic | | | -.02 [-.21, .20] | | .819 | |
| **Central** | | |  | |  | |
| Delta Power & semantic | | | .14 [-.06, .32] | | .150 | |
| Theta Power & semantic | | | .13 [-.10, .32] | | .165 | |
| Alpha Power & semantic | | | .20 [-.01, .10] | | .052 | |
| Beta Power & semantic | | | .04 [-.14, .23] | | .663 | |
| **Parietal** | | |  | |  | |
| Delta Power & semantic | | | .09 [-.12, .10] | | .362 | |
| Theta Power & semantic | | | .09 [-.10, .30] | | .354 | |
| Alpha Power & semantic | | | .20 [-.03, .20] | | .071 | |
| Beta Power & semantic | | | .10 [-.11, .30] | | .393 | |
| **SAM Semantic and baseline** | | |  | |  | |
| **Frontal eyes open** | | |  | |  | |
| Delta Power & semantic | | | .05 [-.13, .24] | | .560 | |
| Theta Power & semantic | | | -.02 [-.20, .20] | | .823 | |
| Alpha Power & semantic | | | .20 [.00, .36] | | .040 | |
| Beta Power & semantic | | | -.03 [-.22, .15] | | .718 | |
| **Frontal eyes closed** | | |  | |  | |
| Delta Power & semantic | | | -.00 [-.20, .20] | | .997 | |
| Theta Power & semantic | | | .22 [.04, 40] | | .015 | |
| Alpha Power & semantic | | | .42 [.26, .60] | | <.0001 | |
| Beta Power & semantic | | | .10 [-.10, .30] | | .299 | |
| **Central eyes open** | | |  | |  | |
| Delta Power & semantic | | | .06 [-.13, .24] | | .520 | |
| Theta Power & semantic | | | -.03 [-.22, .15] | | .732 | |
| Alpha Power & semantic | | | .20 [.00, .40] | | .040 | |
| Beta Power & semantic | | | .06 [-.13, .24] | | .519 | |
| **Central eyes closed** | | |  | |  | |
| Delta Power & semantic | | | .42 [-.14, .23] | | .650 | |
| Theta Power & semantic | | | .21 [.03, .40] | | .020 | |
| Alpha Power & semantic | | | .10 [.22, .54] | | <.0001 | |
| Beta Power & semantic | | | 10 [-.10, .30] | | .254 | |
| **Parietal eyes open** | | |  | |  | |
| Delta Power & semantic | | | .07 [-.12, .25] | | .447 | |
| Theta Power & semantic | | | -.04 [-.23, .14] | | .642 | |
| Alpha Power & semantic | | | .25 [.10, .41] | | .007 | |
| Beta Power & semantic | | | .13 [-.06, .30] | | .163 | |
| **Parietal eyes closed** | | |  | |  | |
| Delta Power & semantic | | | .05 [-.13, .23] | | .57 | |
| Theta Power & semantic | | | .21 [.02, .38] | | .022 | |
| Alpha Power & semantic | | | .37 [.20, .52] | | **<.0001** | |
| Beta Power & semantic | | | .21 [.02, .40] | | .023 | |
|  | |  | |  | |  | |
| **SAM spatial & 2 back** | | |  | |  | |
| **Frontal** | | |  | |  | |
| Delta Power & spatial | | | .09 [-.10, .27] | | .339 | |
| Theta Power & spatial | | | .15 [-.04, .32] | | .103 | |
| Alpha Power & spatial | | | .13 [-.05, .30] | | .147 | |
| Beta Power & spatial | | | .06 [-.12, .24] | | .505 | |
| **Central** | | |  | |  | |
| Delta Power & spatial | | | .14 [ -.04, .31] | | .124 | |
| Theta Power & spatial | | | .19 [.01, .32] | | .033 | |
| Alpha Power & spatial | | | .15 [ -.03, 033] | | .096 | |
| Beta Power & spatial | | | -.001 [-.20, .18] | | .993 | |
| **Parietal** | | |  | |  | |
| Delta Power & spatial | | | .28 [.10, .44] | | .002 | |
| Theta Power & spatial | | | .26 [.76, .42 | | .005 | |
| Alpha Power & spatial | | | .19 [.00, .26] | | .039 | |
| Beta Power & spatial | | | .04 [-.14, .22] | | .662 | |
| **SAM spatial and 3 back** | | |  | |  | |
| **Frontal** | | |  | |  | |
| Delta Power & spatial | | | -.10 [-.30, .10] | | .342 | |
| Theta Power & spatial | | | -.02 [-.21, .20] | | .815 | |
| Alpha Power & spatial | | | .12 [-.10, .30] | | .214 | |
| Beta Power & spatial | | | .08 [-.11, .30] | | .410 | |
| **Central** | | |  | |  | |
| Delta Power & spatial | | | -.03 [-.23, .20] | | .761 | |
| Theta Power & spatial | | | .10 [-.11, .37] | | .397 | |
| Alpha Power & spatial | | | .20 [-.02, .35] | | .065 | |
| Beta Power & spatial | | | .10 [-.12, .17] | | .444 | |
| **Parietal** | | |  | |  | |
| Delta Power & spatial | | | .03 [-.16, .22] | | .720 | |
| Theta Power & spatial | | | .15 [0.04, .33] | | .120 | |
| Alpha Power & spatial | | | .20 [-.00, .37] | | .049 | |
| Beta Power & spatial | | | .10 [0.10, .39] | | .289 | |
| **SAM spatial & baseline** | | |  | |  | |
| **Frontal eyes open** | | |  | |  | |
| Delta Power & spatial | | | .02 [-.17, .20] | | .852 | |
| Theta Power & spatial | | | .13 [-.05, .31] | | .147 | |
| Alpha Power & spatial | | | .12 [-.07, .30] | | .207 | |
| Beta Power & spatial | | | .03 [-.16, .21] | | .777 | |
| **Frontal eyes closed** | | |  | |  | |
| Delta Power & spatial | | | .20 [.01, .40] | | .030 | |
| Theta Power & spatial | | | .33 [.15, .50] | | < .0001 | |
| Alpha Power & spatial | | | .22 [.04, .40] | | .014 | |
| Beta Power & spatial | | | .00 [-.20, .20] | | .971 | |
| **Central eyes open** | | |  | |  | |
| Delta Power & spatial | | | .22 [.03, .40] | | .016 | |
| Theta Power & spatial | | | .21 [.03, .40] | | .019 | |
| Alpha Power & spatial | | | .15 [-.03, .33] | | .103 | |
| Beta Power & spatial | | | .02 [-.20, .20] | | .847 | |
| **Central eyes closed** | | |  | |  | |
| Delta Power & spatial | | | .20 [.01, .37] | | .033 | |
| Theta Power & spatial | | | .26 [.10, .42] | | .005 | |
| Alpha Power & spatial | | | .21 [.02, .40] | | .025 | |
| Beta Power & spatial | | | -.01 [-.20, .28] | | .925 | |
| **Parietal eyes open** | | |  | |  | |
| Delta Power & spatial | | | .32 [.14, .50] | | < .0001 | |
| Theta Power & spatial | | | .37 [.10, .43] | | .003 | |
| Alpha Power & spatial | | | .27 [-.02, .23] | | .071 | |
| Beta Power & spatial | | | .05 [.-.13, .23] | | .568 | |
| **Parietal eyes closed** | | |  | |  | |
| Delta Power & spatial | | | .25 [.10, .42] | | .005 | |
| Theta Power & spatial | | | .24 [.05, .40] | | .010 | |
| Alpha Power & spatial | | | .20 [-.02, .34] | | .077 | |
| Beta Power & spatial | | | .03 [-.16, .21] | | .779 | |
| **SAM future & 2 back** | |  | |  | |
| **Frontal** | |  | |  | |
| Delta Power & future | | .07 [-.11, .25] | | .427 | |
| Theta Power & future | | .08 [-.11, .26] | | .392 | |
| Alpha Power & future | | -.00 [-.19, .20] | | .969 | |
| Beta Power & future | | -.08 [-.26, .10] | | .357 | |
| **Central** | |  | |  | |
| Delta Power & future | | .06 [-.13, .24] | | .520 | |
| Theta Power & future | | .05 [-0.14, .23] | | .606 | |
| Alpha Power & future | | .01 [-.17, .19] | | .919 | |
| Beta Power & future | | -.07 [-.25, .11] | | .431 | |
| **Parietal** | |  | |  | |
| Delta Power & future | | .04 [-.14, .23] | | .626 | |
| Theta Power & future | | .12 [-.17, .20] | | .850 | |
| Alpha Power & future | | -.04 [-.22, .15] | | .688 | |
| Beta Power & future | | -.10 [-.30, .08] | | .268 | |
| **SAM future and 3 back** | |  | |  | |
| **Frontal** | |  | |  | |
| Delta Power & future | | .19 [-.01, .40] | | .005 | |
| Theta Power & future | | .15 [-.05, .33] | | .127 | |
| Alpha Power & future | | .12 [-.08, .30] | | .227 | |
| Beta Power & future | | .10 [-.10, .30] | | .303 | |
| **Central** | |  | |  | |
| Delta Power & future | | .11 [-.10, .10] | | .240 | |
| Theta Power & future | | .10 [-.10, .30] | | .293 | |
| Alpha Power & future | | .16 [.14, .30] | | .519 | |
| Beta Power & future | | .06 [-.13, .25] | | .501 | |
| **Parietal** | |  | |  | |
| Delta Power & future | | .10 [-.10, .30] | | .317 | |
| Theta Power & future | | .07 [-.13, .30] | | .486 | |
| Alpha Power & future | | .02 [.20, .22] | | .800 | |
| Beta Power & future | | -.01 [-.20, .20] | | .932 | |
| **SAM future & baseline** | |  | |  | |
| **Frontal eyes open** | |  | |  | |
| Delta Power & future | | .01 [-.20, .20] | | .868 | |
| Theta Power & future | | .05 [-.14, .23] | | .589 | |
| Alpha Power & future | | .07 [-.10, .30] | | .353 | |
| Beta Power & future | | .02 [-.70, .20] | | .839 | |
| **Frontal eyes closed** | |  | |  | |
| Delta Power & future | | -.01 [-.20, .20] | | .953 | |
| Theta Power & future | | .07 [-.12, 0.25] | | .472 | |
| Alpha Power & future | | .20 [-.02, .034] | | .077 | |
| Beta Power & future | | .03 [-.15, .22] | | .728 | |
| **Central eyes open** | |  | |  | |
| Delta Power & future | | -.05 [-.23, .14] | | .619 | |
| Theta Power & future | | .07 [-.12, .25] | | .480 | |
| Alpha Power & future | | .10 [-.09, .30] | | .305 | |
| Beta Power & future | | .05 [-.14, .23] | | .587 | |
| **Central eyes closed** | |  | |  | |
| Delta Power & future | | -.01 [-.20, .20] | | .951 | |
| Theta Power & future | | .10 [-.10, .30] | | .370 | |
| Alpha Power & future | | .20 [-.00, .40] | | .044 | |
| Beta Power & future | | .04 [-.14, .22] | | .662 | |
| **Parietal eyes open** | |  | |  | |
| Delta Power & future | | -.01 [-.20, .20] | | .908 | |
| Theta Power & future | | .04 [-.14, .23] | | .643 | |
| Alpha Power & future | | .013 [.10, .30] | | .175 | |
| Beta Power & future | | .02 [-.20, .20] | | .833 | |
| **Parietal eyes closed** | |  | |  | |
| Delta Power & future | | .10 [-.14, .23] | | .578 | |
| Theta Power & future | | .11 [-.10, .30] | | .230 | |
| Alpha Power & future | | .20 [.01, .40] | | .037 | |
| Beta Power & future | | .10 [-.12, .25] | | .467 | |
